# Supplementary figures and images for: Reprogramming of MLL-AF9 leukemia cells into pluripotent stem cells
Source: PubMed Central journal article supplement — Leukemia. 2013 Nov 15;28(5):1071–80. doi: 10.1038/leu.2013.304 (PMC4017259; doi:10.1038/leu.2013.304), 2013-11-15

# Figure S1

**A**

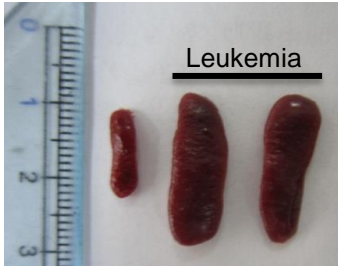

**B**

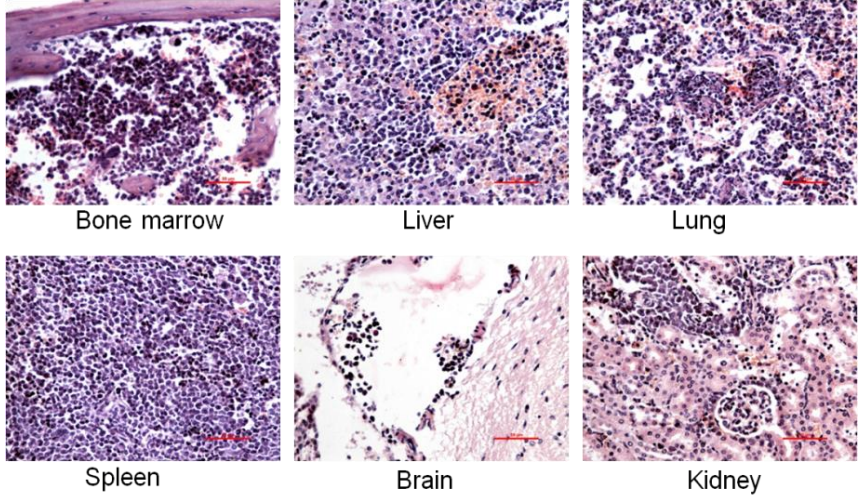

**C**

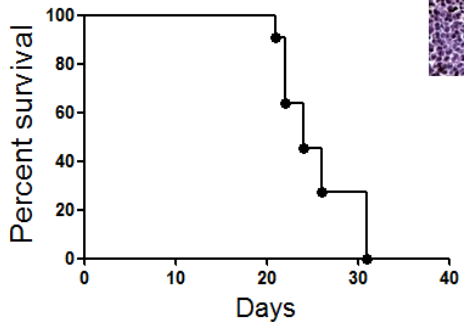

Supplement: leu2013304x1.pdf [file leu2013304x1.pdf]

# Figure S2

**A**

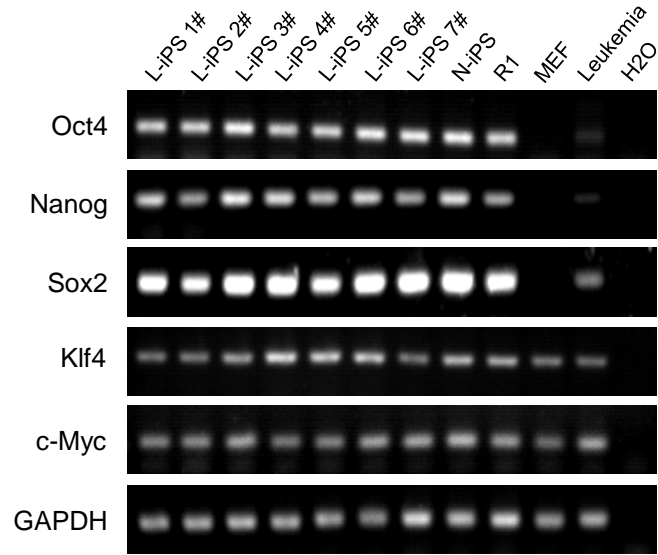

**B**

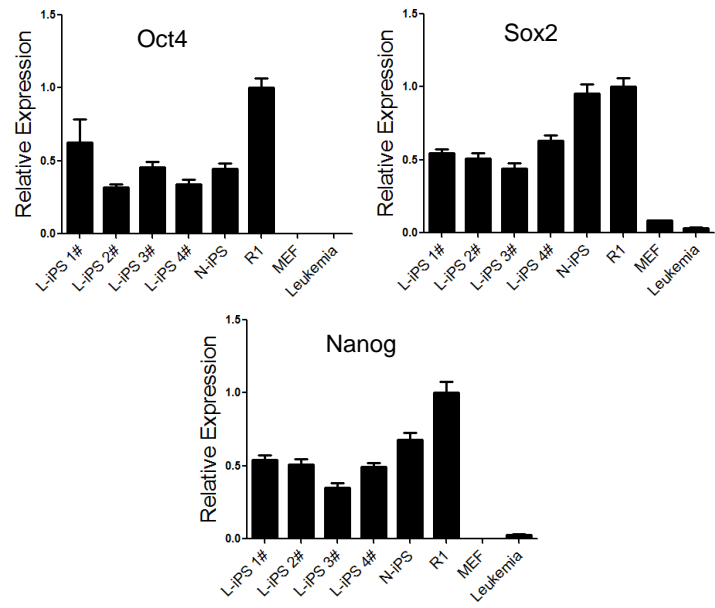

**C**

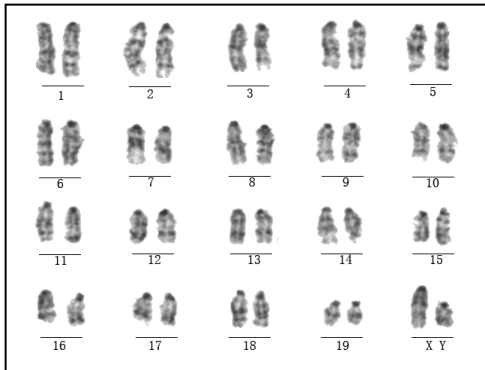

**D**

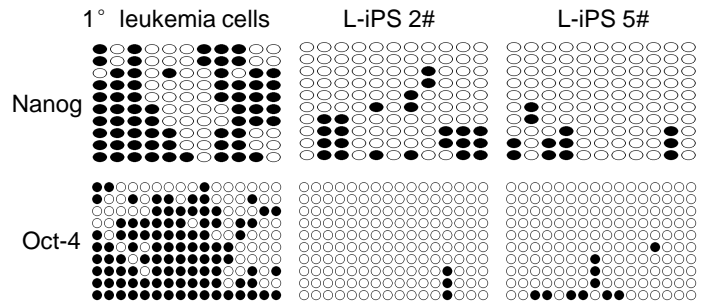

Supplement: leu2013304x2.pdf [file leu2013304x2.pdf]

# Figure S3

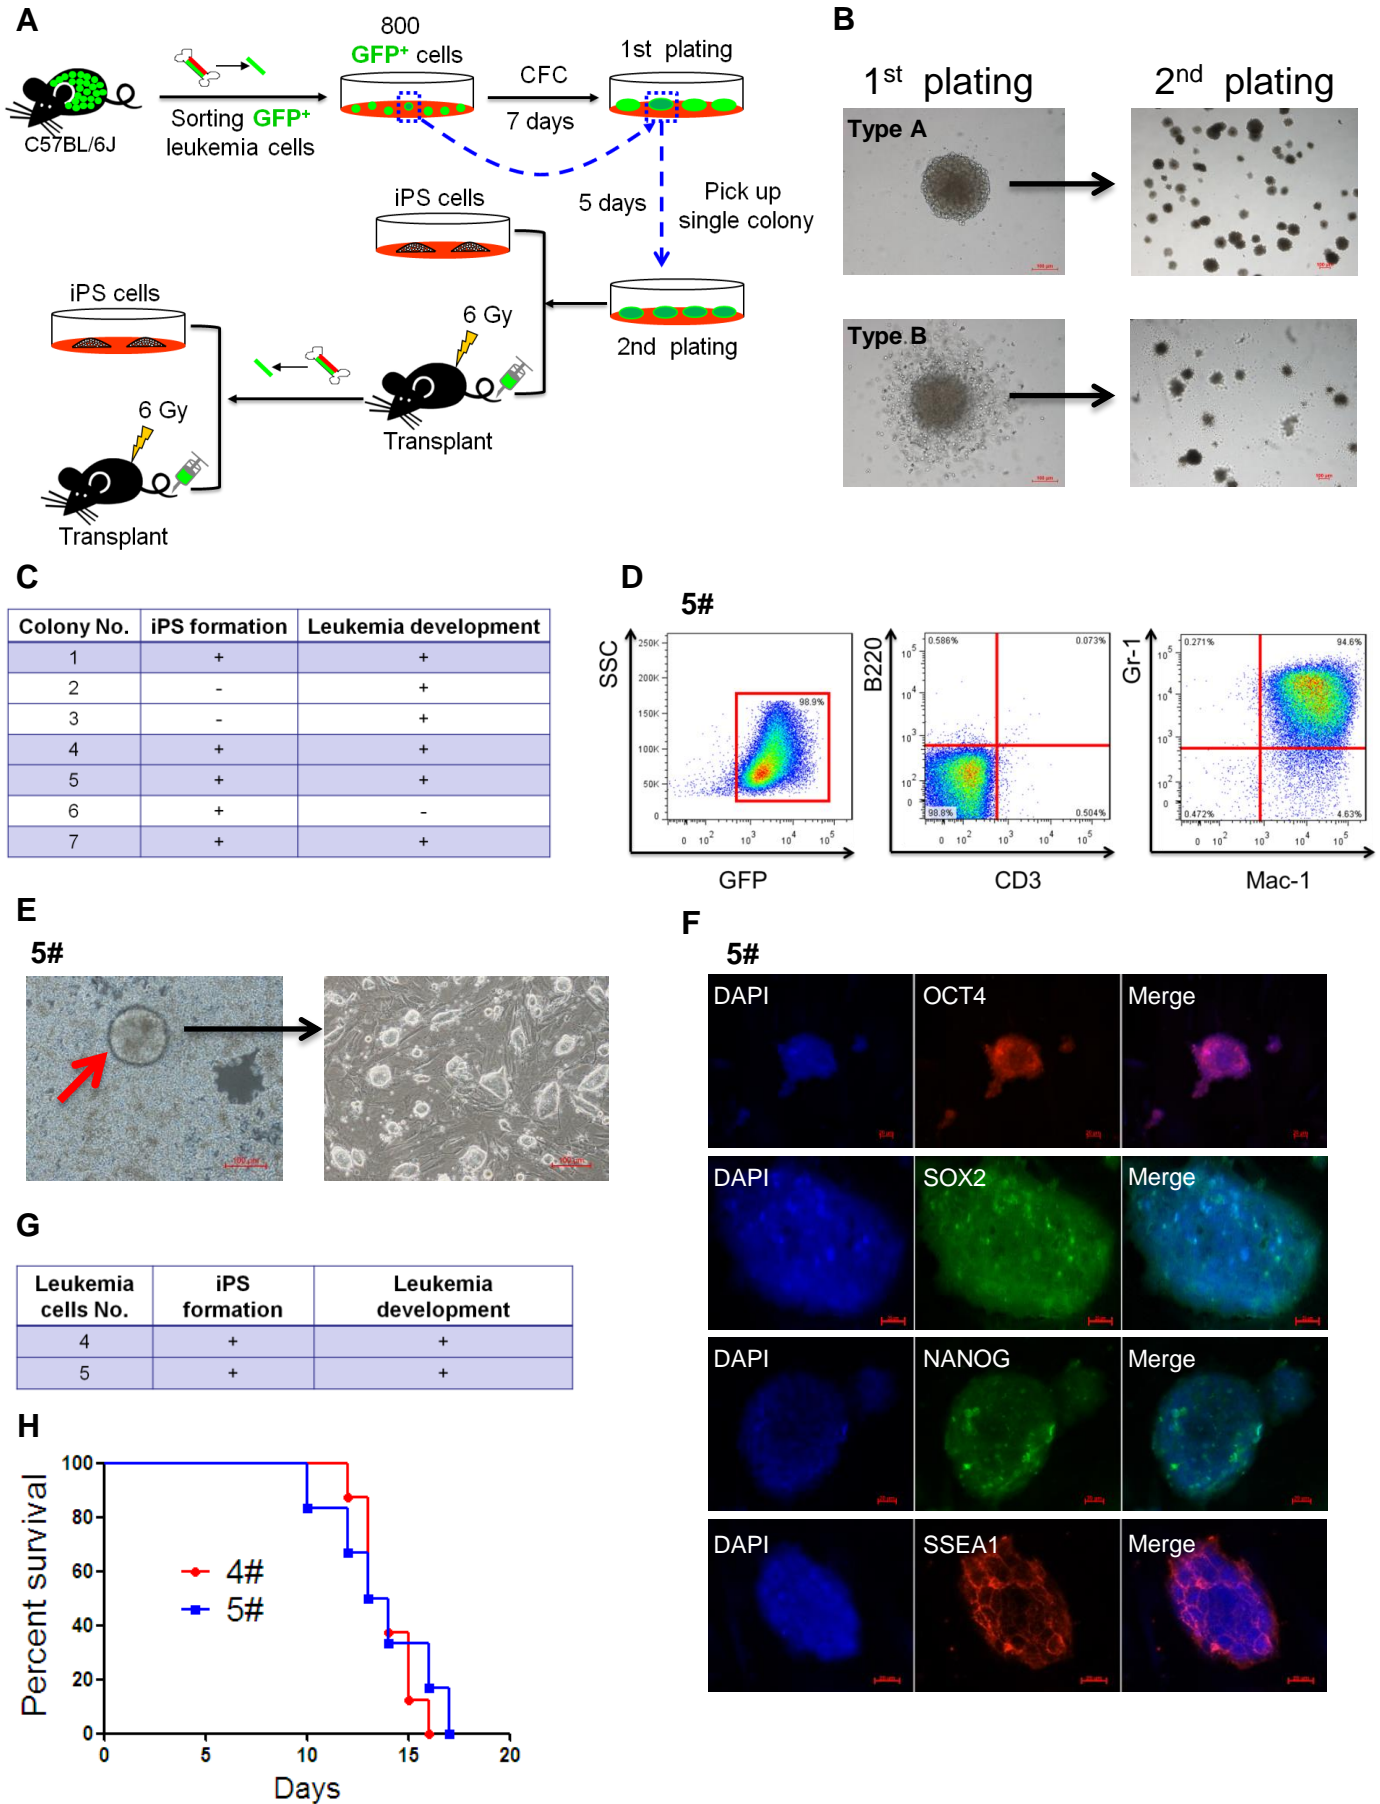

Supplement: leu2013304x3.pdf [file leu2013304x3.pdf]

# Figure S4

**A**

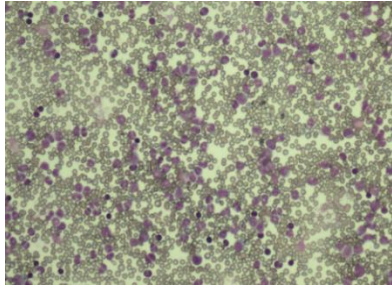

**B**

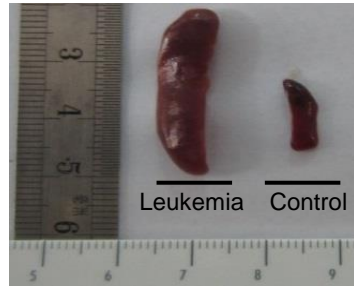

**C**

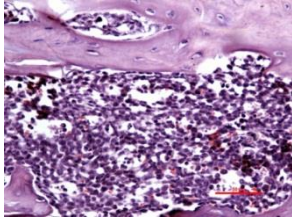

Bone marrow

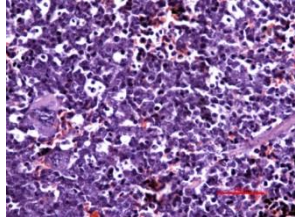

Spleen

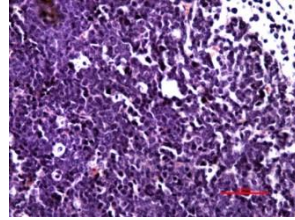

Thymus

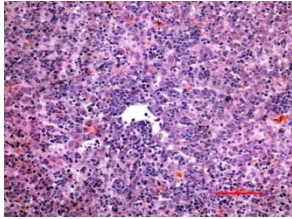

Liver

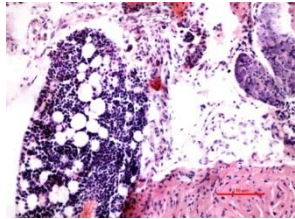

Mediastinum

**D**

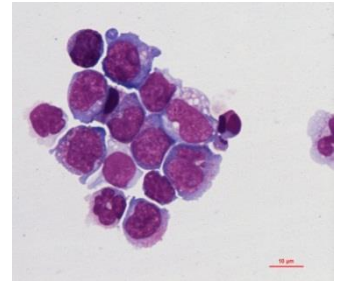

Supplement: leu2013304x4.pdf [file leu2013304x4.pdf]

# Figure S5

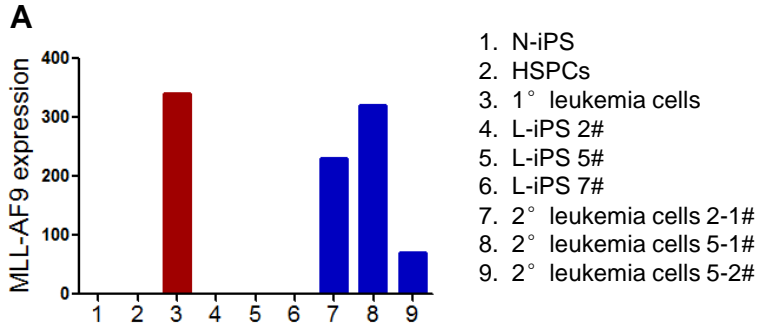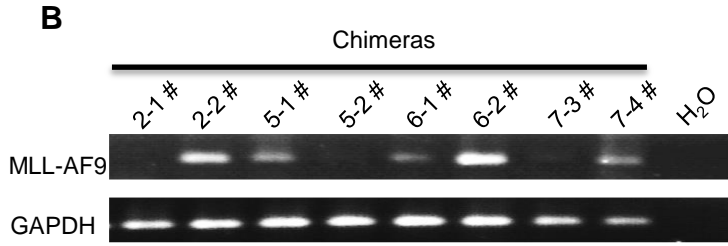

Supplement: leu2013304x5.pdf [file leu2013304x5.pdf]

Figure S6

A

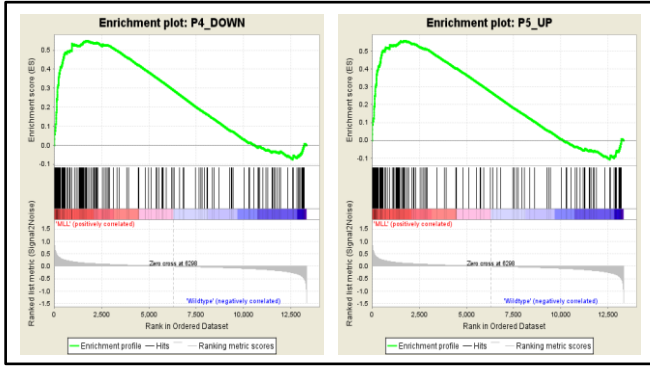

B

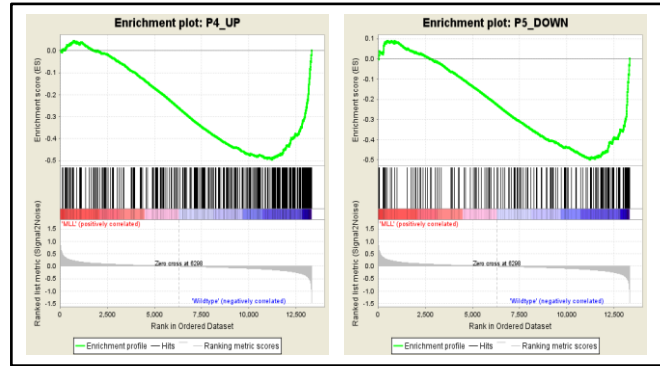

Supplement: leu2013304x6.pdf [file leu2013304x6.pdf]

# Figure S7

**A**

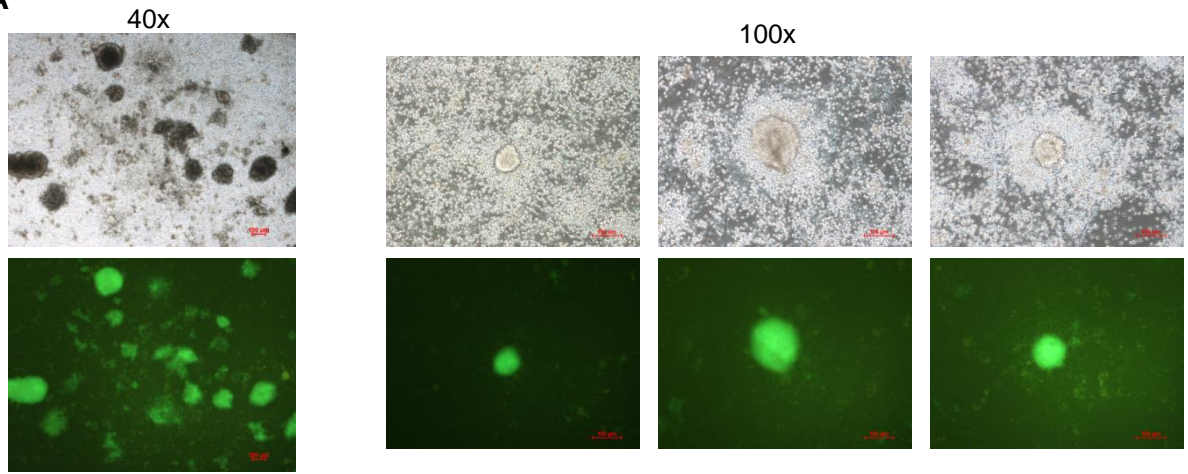

**B**

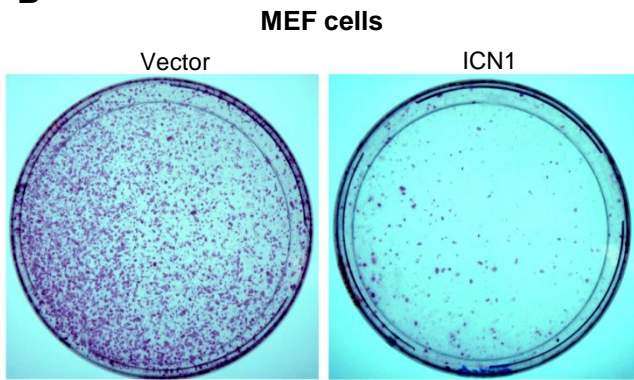

**C**

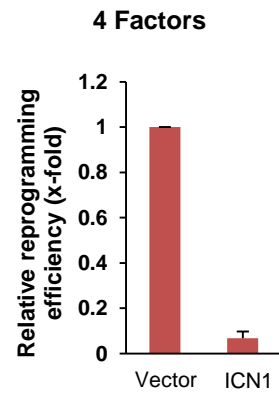

Supplement: leu2013304x7.pdf [file leu2013304x7.pdf]
